# Supplementary material for: Different sample preparation methods for the analysis of suspension fertilizers combining LIBS and liquid-to-solid matrix conversion: determination of essential and toxic elements
Source: Royal Society of Chemistry journal article supplement (doi:10.1039/c7ay01049d), 2017-01-01

Different sample preparation methods for analysis of suspension fertilizers combining LIBS and liquid-to-solid matrix conversion: determination of essential and toxic elements

Daniel Fernandes Andrade, Marco Aurélio Sperança, Edenir Rodrigues Pereira-Filho\*

Group of Applied Instrumental Analysis, Department of Chemistry, Federal University of São Carlos, Zip Code 13565-905, São Carlos, São Paulo State, Brazil

\*Corresponding author: [erpf@ufscar.br](mailto:erpf@ufscar.br)

Phone number: +55 16 3351-8092

Fax number: +55 16 3351-8350

## Supplementary material

**Table 1S** Instrumental parameters for ICP OES analysis.

| <b>Instrument parameter</b>                                        | <b>Operational conditions</b>                                                                                                                 |
|--------------------------------------------------------------------|-----------------------------------------------------------------------------------------------------------------------------------------------|
| Integration time (s)                                               | 15 s for low and 5 s for high wavelengths                                                                                                     |
| Sample introduction flow rate (mL min <sup>-1</sup> )              | 2.1                                                                                                                                           |
| Pump stabilization time (s)                                        | 5                                                                                                                                             |
| Radio frequency (RF) applied power (kW)                            | 1.15                                                                                                                                          |
| Argon gas flow rate (L min <sup>-1</sup> )                         | 12                                                                                                                                            |
| Auxiliary gas flow rate (L min <sup>-1</sup> )                     | 0.50                                                                                                                                          |
| Nebulizer gas flow rate (L min <sup>-1</sup> )                     | 0.70                                                                                                                                          |
| Viewing mode                                                       | Radial                                                                                                                                        |
| Elements and wavelengths (nm), I and II are atomic and ionic lines | B I 249.773, Ca II 317.933, Cu I 324.754, Fe II 240.488, K I 766.490, Mg I 285.213, Mn II 294.920, Na I 589.592, P I 178.284 and Zn I 481.053 |

**Table 2S** Operating parameters used in ICP-MS measurements.

| <b>Instrumental parameter</b>                  | <b>Operational conditions</b>                                               |
|------------------------------------------------|-----------------------------------------------------------------------------|
| Radio frequency generator (MHz)                | 27                                                                          |
| Radio frequency (RF) applied power (kW)        | 1.55                                                                        |
| Argon gas flow rate (L min <sup>-1</sup> )     | 14.0                                                                        |
| Auxiliary gas flow rate (L min <sup>-1</sup> ) | 0.8                                                                         |
| Nebulizer gas flow rate (L min <sup>-1</sup> ) | 1.18                                                                        |
| Sampling depth (mm)                            | 5.0                                                                         |
| Integration time (s)                           | 3.0                                                                         |
| Sampling cone (mm)                             | Nickel 0.8                                                                  |
| Skimmer (mm)                                   | Nickel 1.2                                                                  |
| Nebulizer                                      | Glass concentric (MicroMist)                                                |
| Spray chamber                                  | Cyclonic                                                                    |
| Replicates                                     | 3                                                                           |
| Mass/charge ratios monitored                   | <sup>52</sup> Cr, <sup>75</sup> As, <sup>111</sup> Cd and <sup>208</sup> Pb |

**Table 3S** Concentrations (average, n = 3) and recoveries (%) for samples S1, S2 and S4 spiked with a standard solution of selected elements (Ba, Ca, Cu, Fe, K, Mg, Mn, Na, P and Zn) by ICP OES.

| Emission line<br>(nm) | Added<br>(mg L <sup>-1</sup> ) | Found (mg L <sup>-1</sup> ) |     |     | Recovery (%) |     |     |
|-----------------------|--------------------------------|-----------------------------|-----|-----|--------------|-----|-----|
|                       |                                | S1                          | S2  | S4  | S1           | S2  | S4  |
| B I 249.773           | 50                             | 47                          | 46  | 41  | 95           | 92  | 82  |
| Ca II 317.933         | 40                             | 35                          | 33  | 41  | 88           | 83  | 102 |
| Cu I 324.754          | 80                             | 86                          | 91  | 71  | 107          | 114 | 88  |
| Fe II 240.488         | 20                             | 20                          | 23  | 17  | 100          | 114 | 83  |
| K I 766.490           | 6.0                            | 6.6                         | 6.4 | 6.8 | 111          | 107 | 113 |
| Mg I 285.213          | 25                             | 29                          | 32  | 24  | 116          | 127 | 98  |
| Mn II 294.920         | 30                             | 28                          | 30  | 35  | 94           | 100 | 116 |
| Na I 589.592          | 4.0                            | 3.3                         | 4.8 | 3.6 | 82           | 119 | 91  |
| P I 178.284           | 10                             | 10                          | 9   | 11  | 100          | 88  | 106 |
| Zn I 481.053          | 40                             | 37                          | 49  | 46  | 94           | 124 | 115 |

**Table 4S** Concentrations (average, n = 3) and recoveries (%) for samples S2, S3 and S7 spiked with a 20 µg L<sup>-1</sup> standard solution of selected elements (As, Cd, Cr and Pb) by ICP-MS.

| Isotope           | Found (µg L <sup>-1</sup> ) |    |    | Recovery (%) |    |     |
|-------------------|-----------------------------|----|----|--------------|----|-----|
|                   | S2                          | S3 | S7 | S2           | S3 | S7  |
| <sup>75</sup> As  | 17                          | 16 | 20 | 84           | 80 | 98  |
| <sup>111</sup> Cd | 17                          | 17 | 16 | 86           | 84 | 80  |
| <sup>52</sup> Cr  | 19                          | 20 | 22 | 94           | 99 | 112 |
| <sup>208</sup> Pb | 17                          | 18 | 15 | 87           | 90 | 76  |

## Figure caption

**Figure 1S** Emission signal intensities of (a) Cu, (b) K, (c) Mg, (d) Mn and (e) Zn preliminarily monitored in immobilized standard solution prepared for Doehlert design experiments (experiment 1 up to 15, optimization of LIBS system).

**Figure 2S** LIBS spectra and the identification of the main signals monitored for the eight samples studied: (a) S1, (b) S2, (c) S3, (d) S4, (e) S5, (f) S6, (g) S7 and (h) S8.

**Figure 3S** Study of polymer stability for the 5 analytes determined: (a) Cu, (b) K, (c) Mg, (d) Mn and (e) Zn.

Figure 1Sa

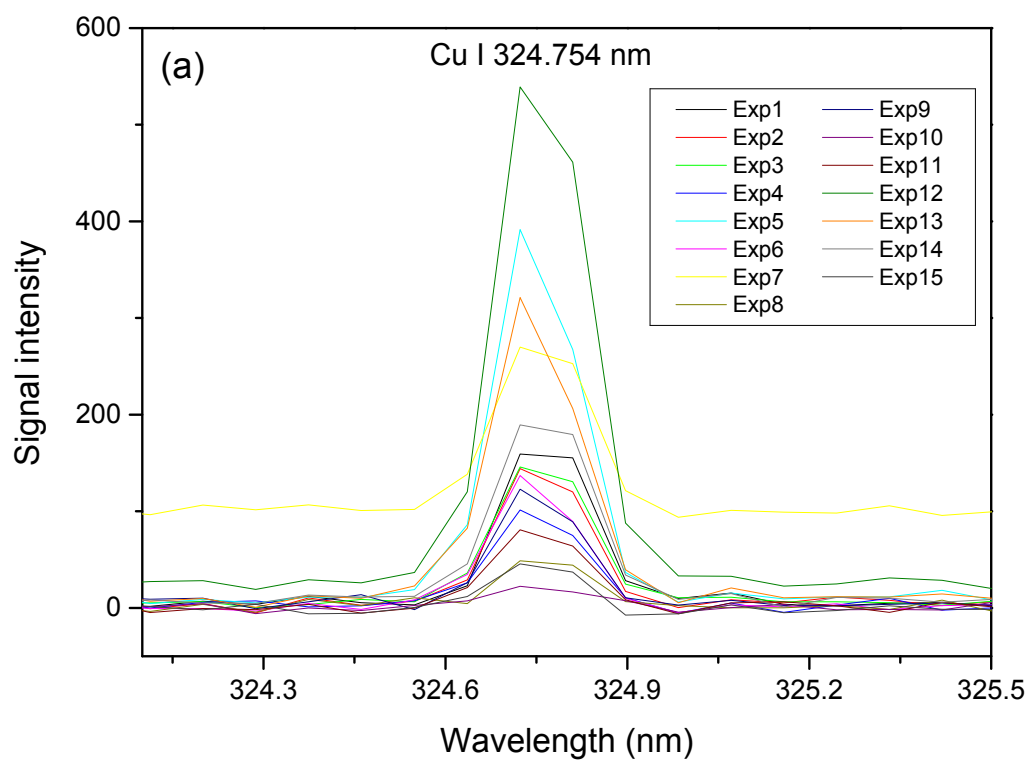

Figure 1Sb

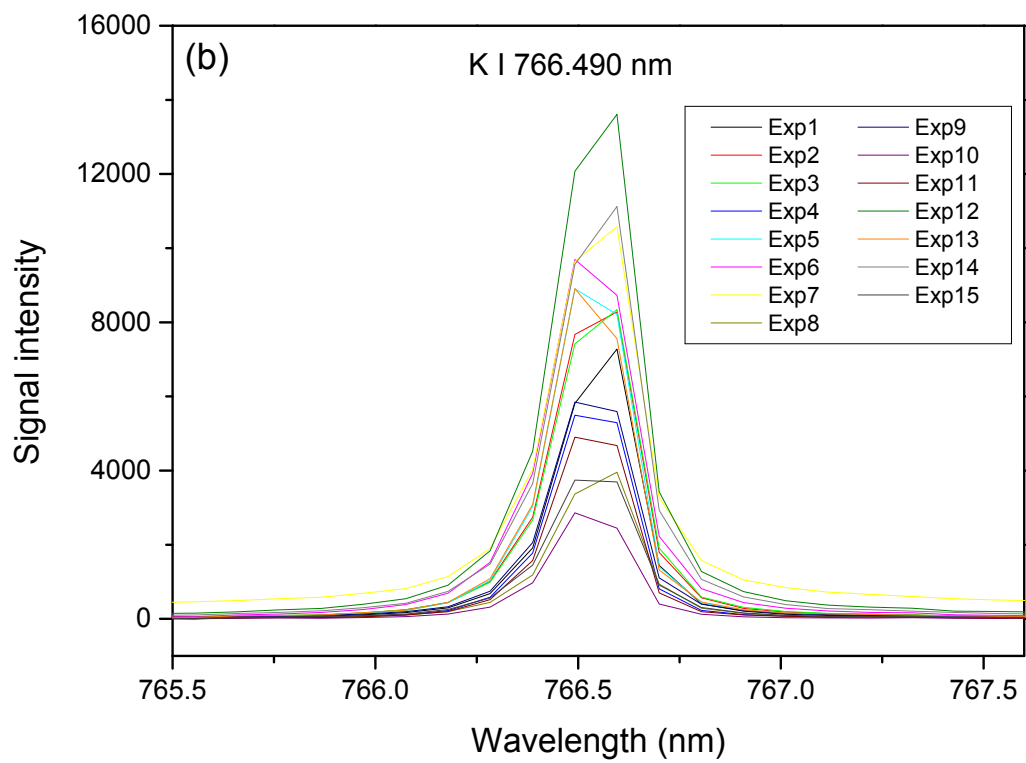



Figure 1Sc

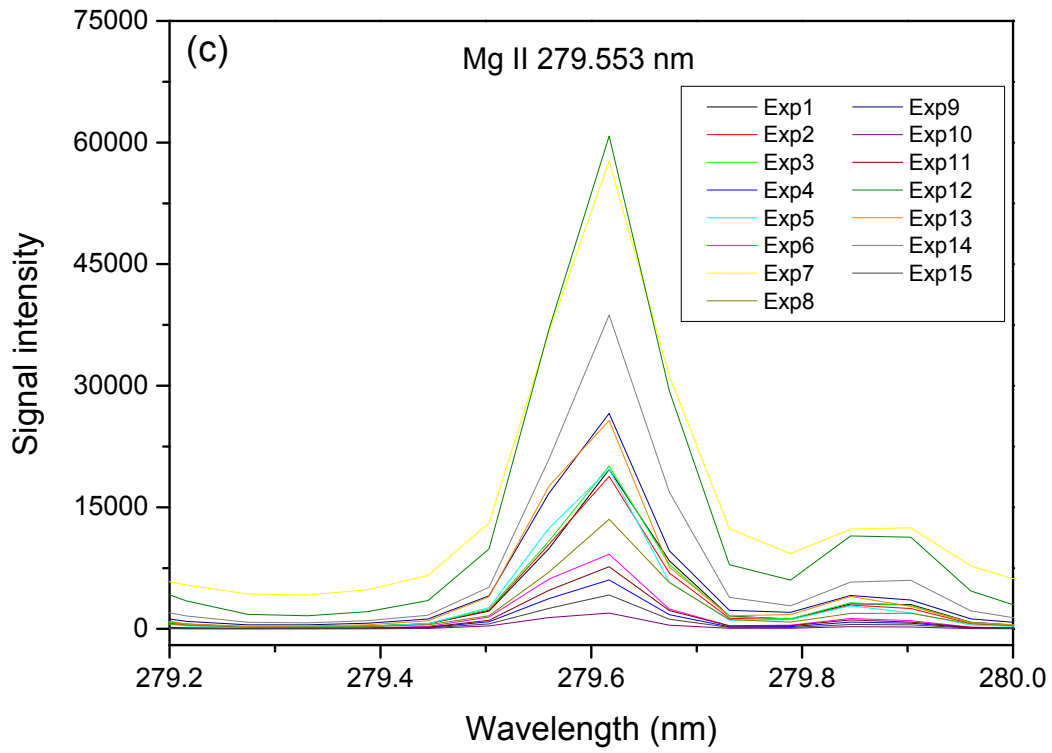

Figure 1Sd

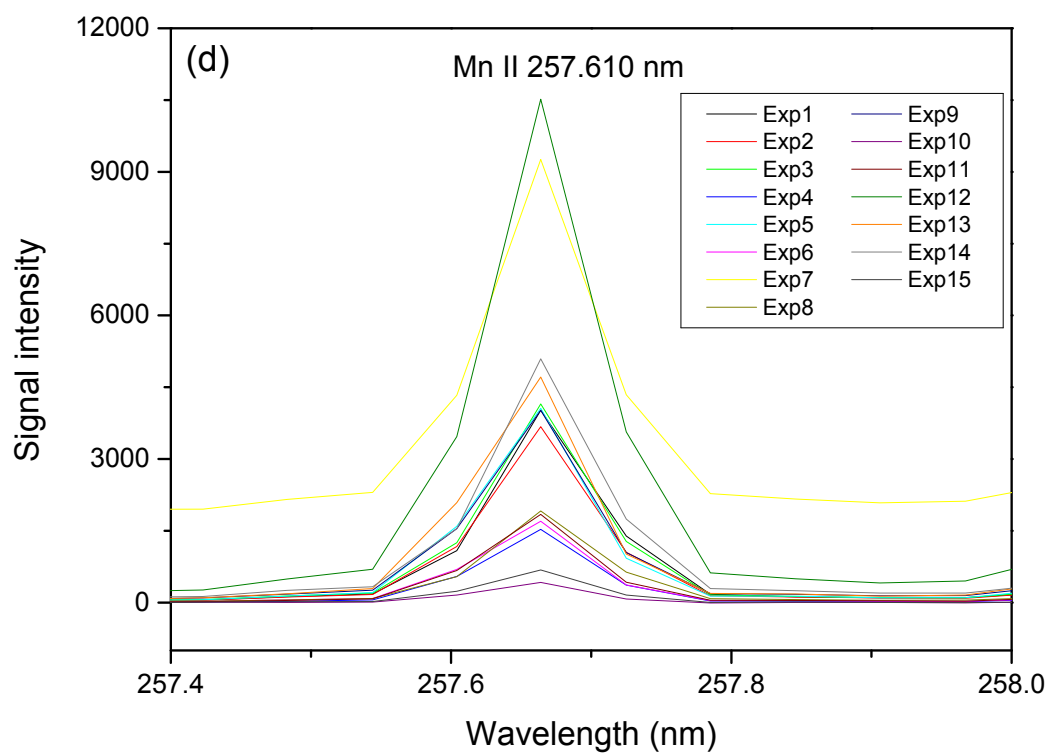

Figure 1Se

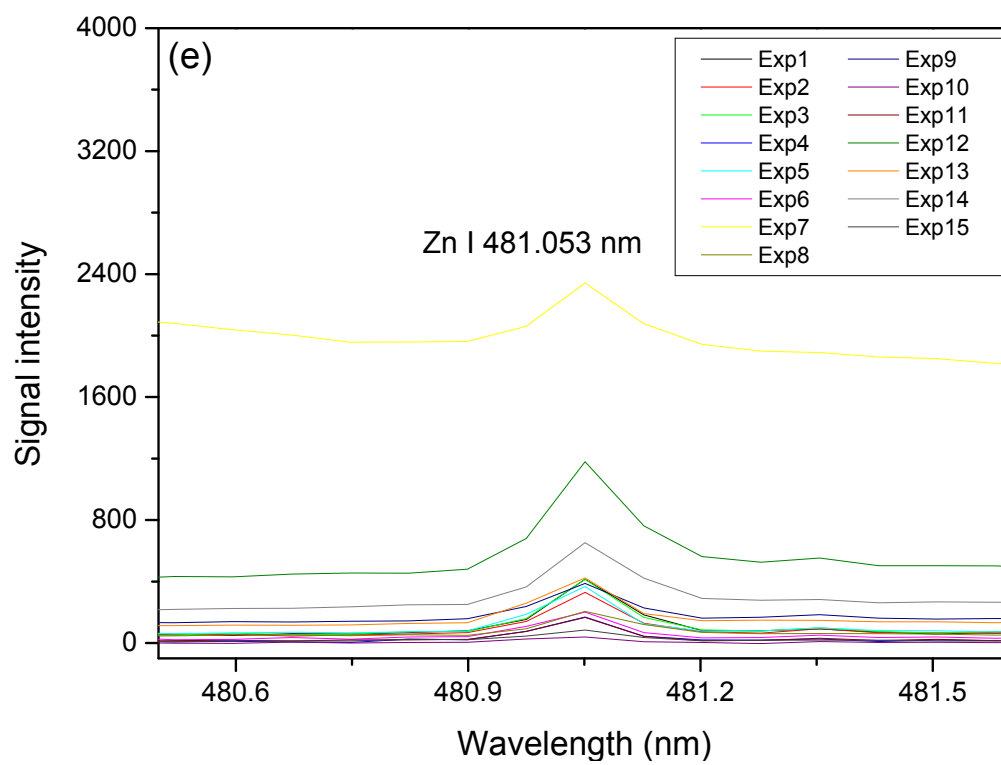

Figure 2Sa

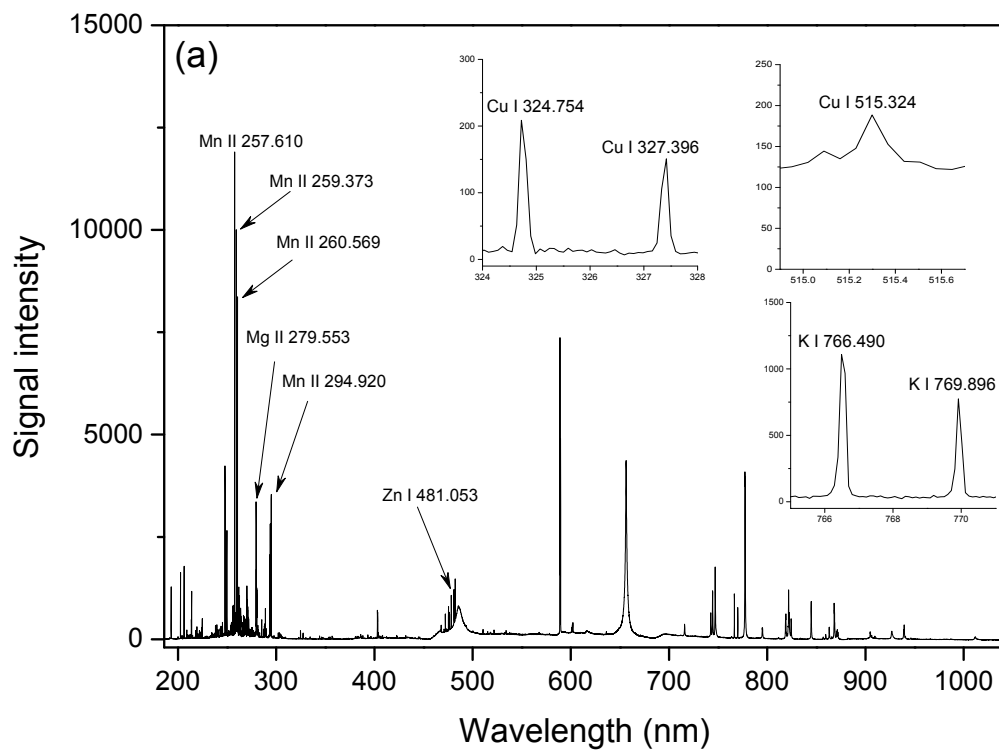

Figure 2Sb

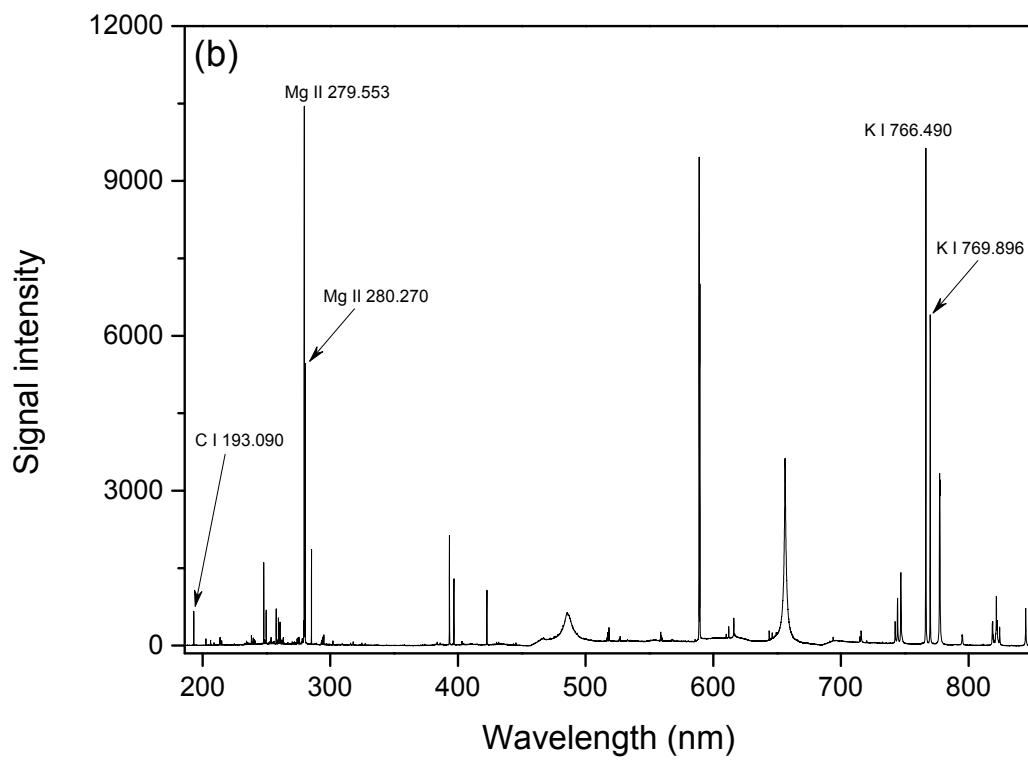

Figure 2Sc

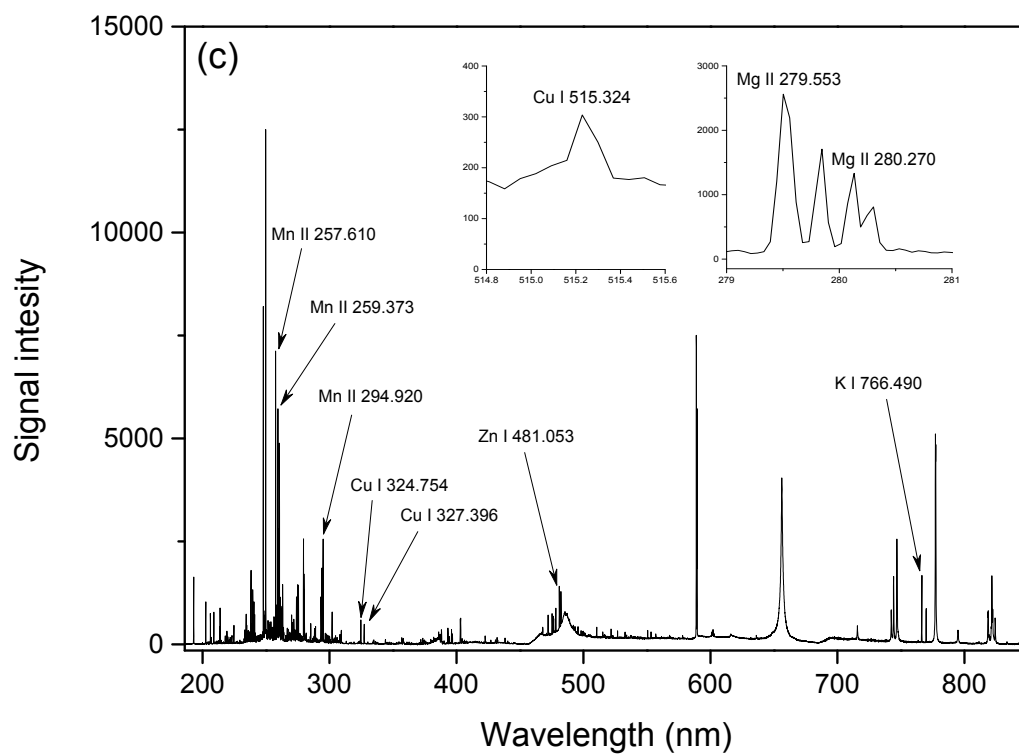

Figure 2Sd

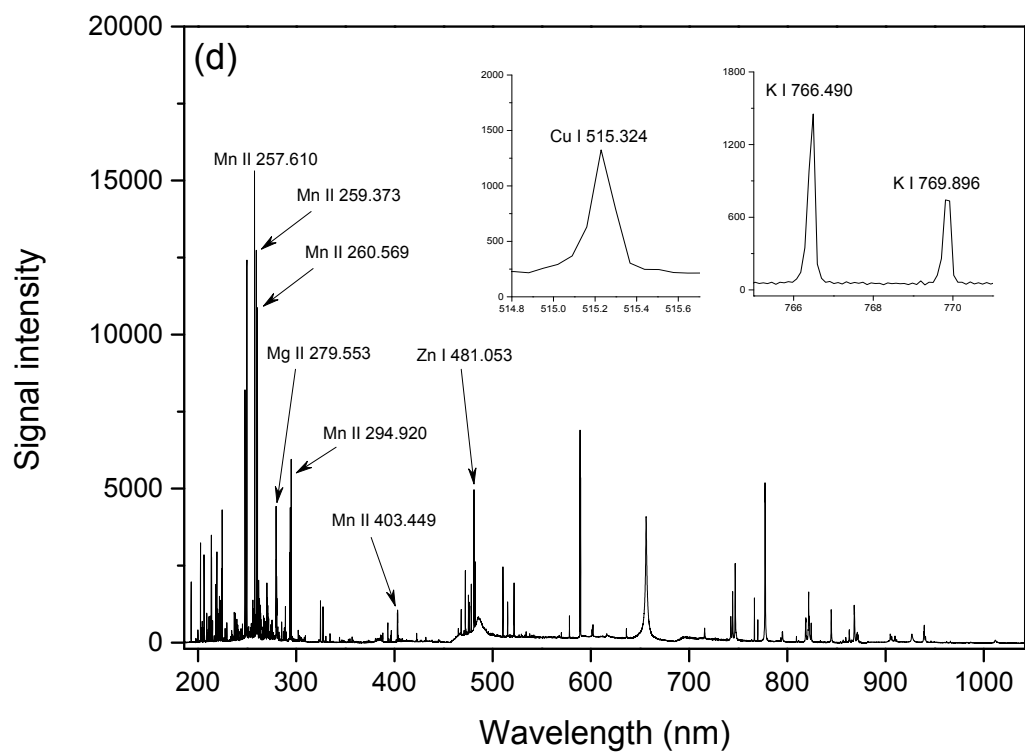

Figure 2Se

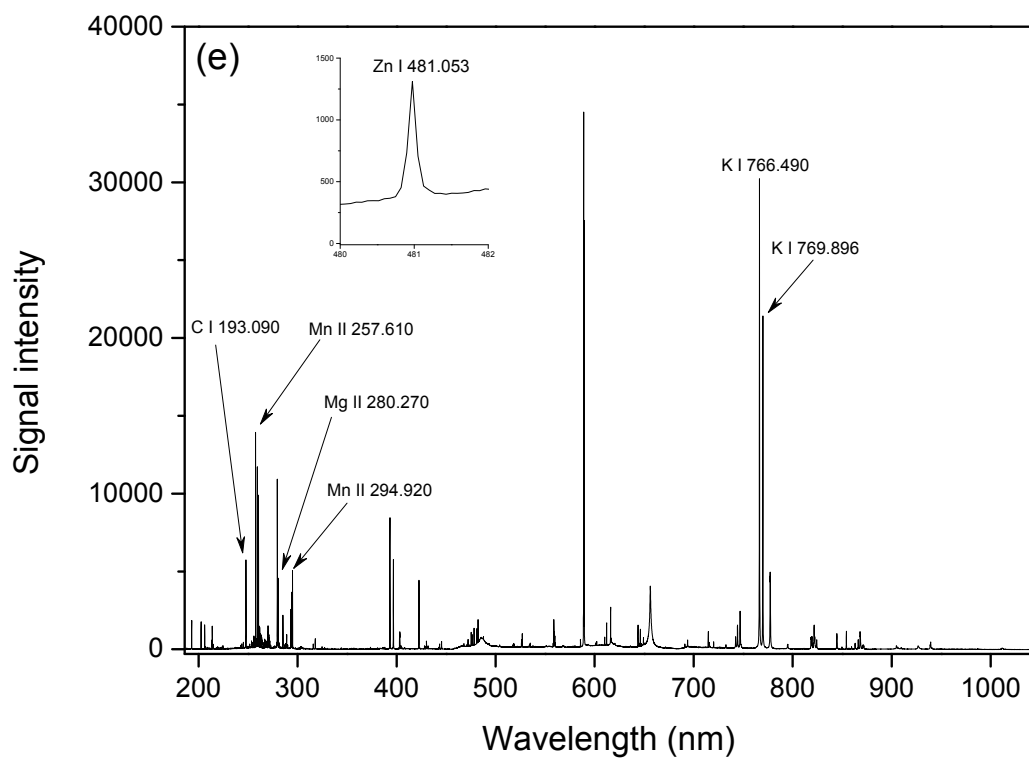



Figure 2Sf

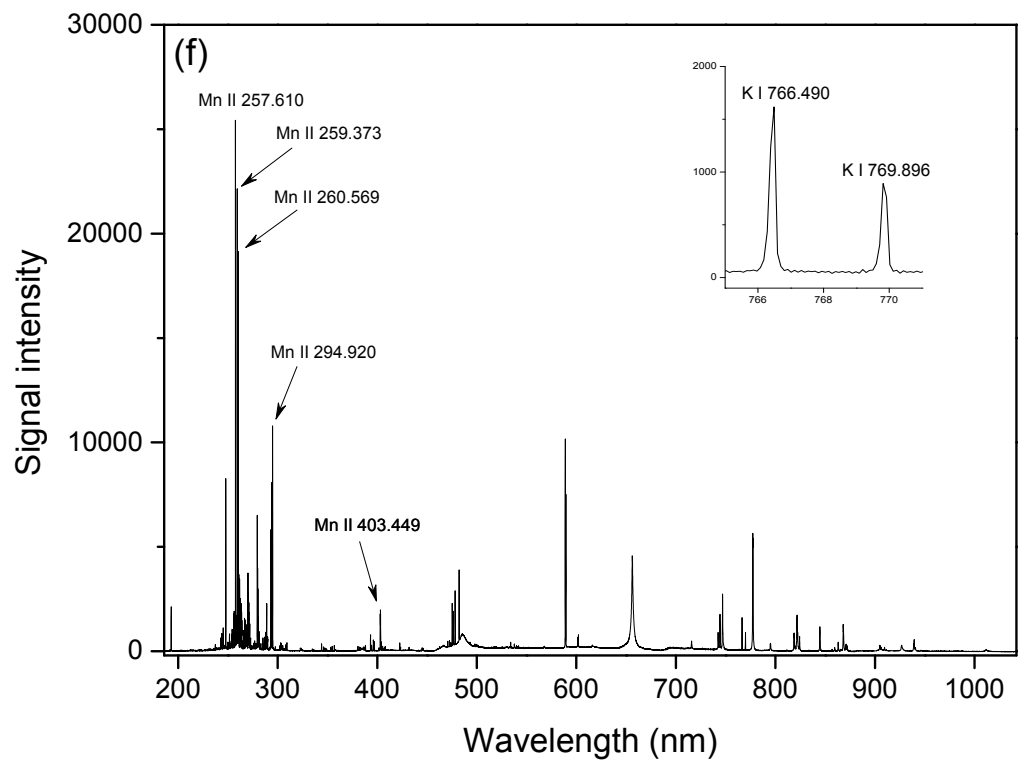

Figure 2Sg

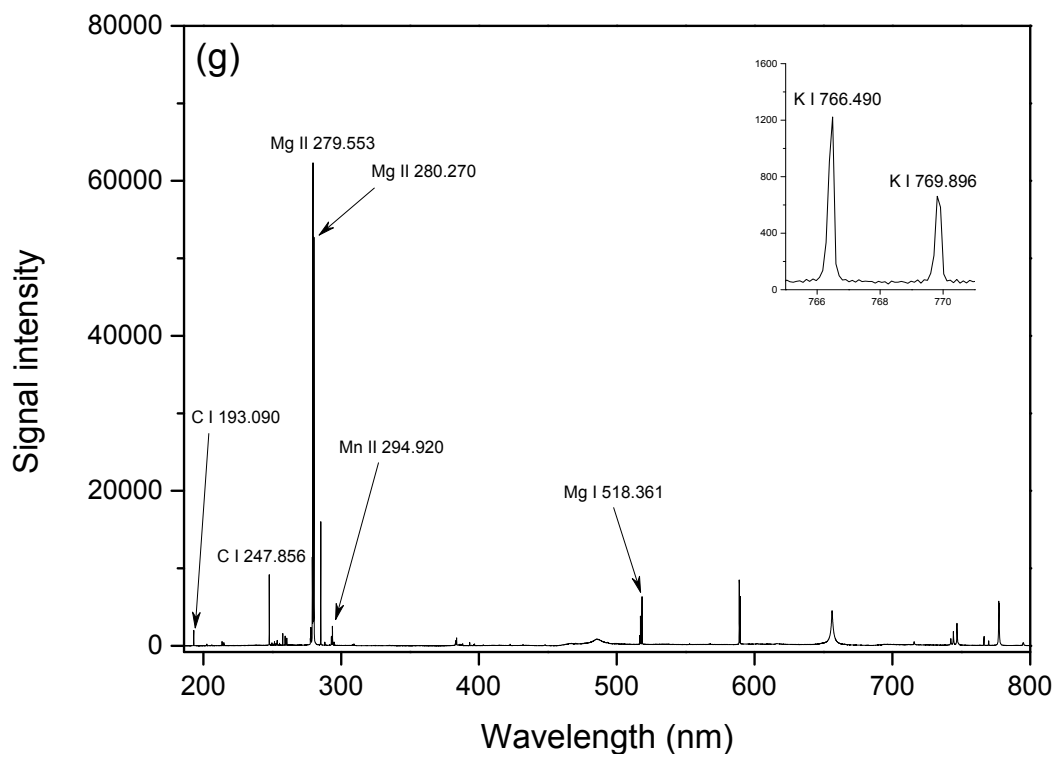

Figure 2Sh

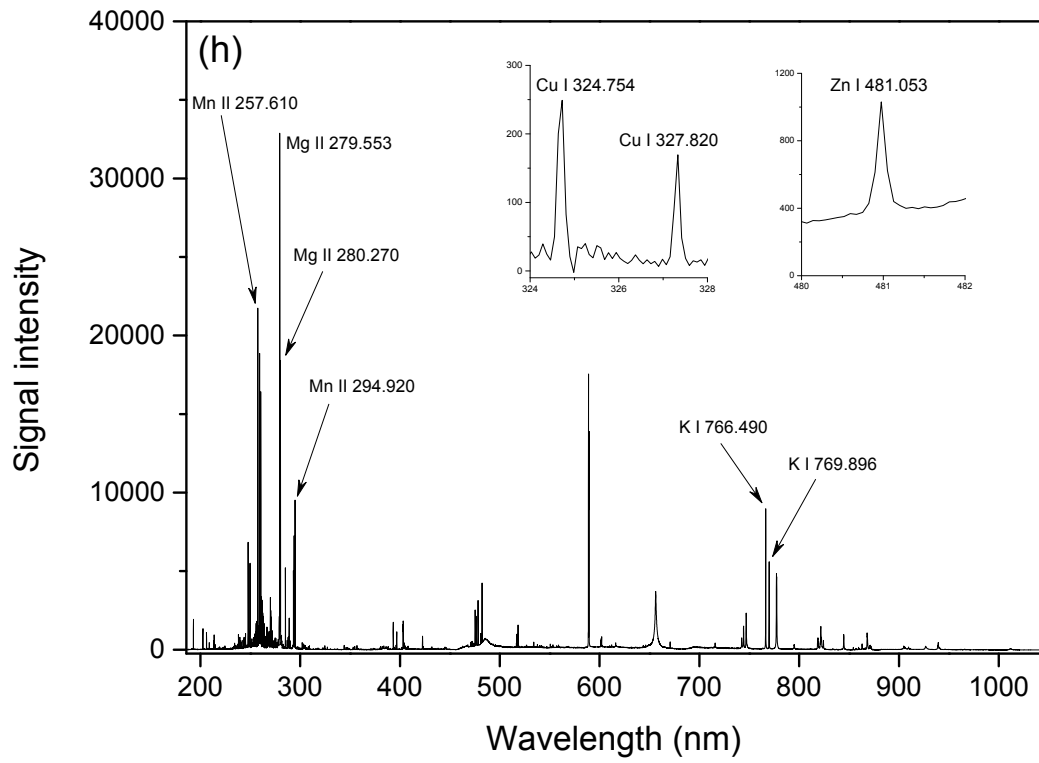

Figure 3S

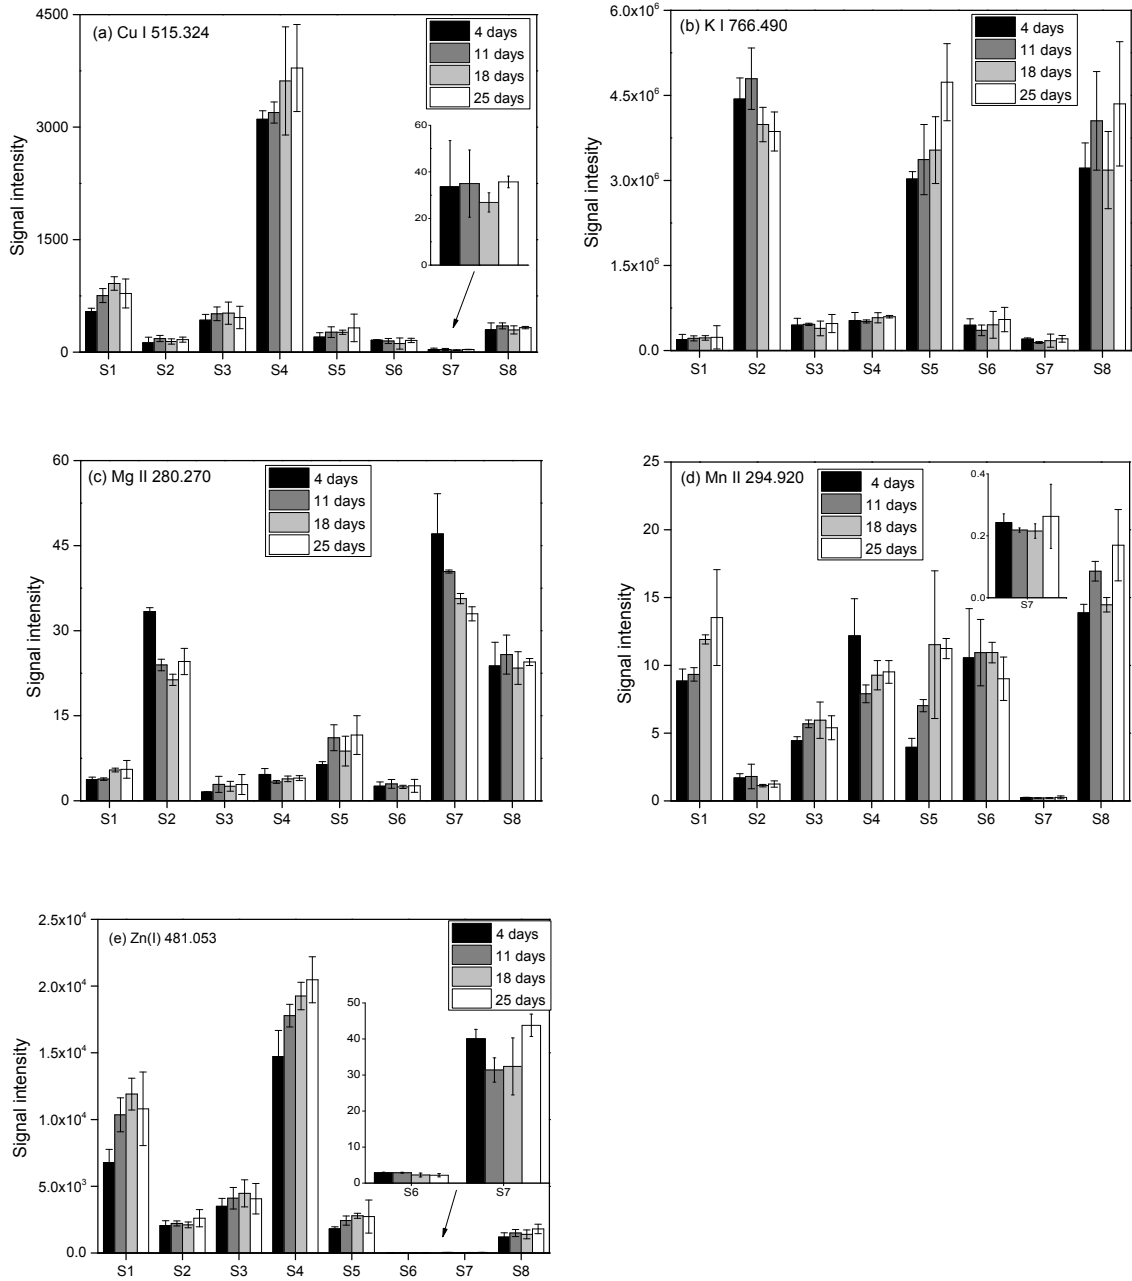

Supplement: c7ay01049d1.pdf [file c7ay01049d1.pdf]
